# Supplementary material for: Choline Supplementation Prevents a Hallmark Disturbance of Kwashiorkor in Weanling Mice Fed a Maize Vegetable Diet: Hepatic Steatosis of Undernutrition
Source: PubMed Central journal article supplement (PMC5986532; doi:10.3390/nu10050653), 2018-05-22
Supplement: nutrients-10-00653-s001.pdf [file nutrients-10-00653-s001.pdf]

| <b>Supplemental Table 1: Mineral and amino acid content of the Maize Vegetable Diet after lyophilization and the Teklad 2020X™ Control Chow*</b> |                      |                           |
|--------------------------------------------------------------------------------------------------------------------------------------------------|----------------------|---------------------------|
|                                                                                                                                                  | Maize Vegetable Diet | Teklad 2020™ Control Chow |
| <i>Minerals</i>                                                                                                                                  |                      |                           |
| Sodium mg/kg                                                                                                                                     | 11510                | 1396                      |
| Potassium mg/kg                                                                                                                                  | 3302                 | 4196                      |
| Calcium mg/kg                                                                                                                                    | 835                  | 8579                      |
| Phosphorous mg/kg                                                                                                                                | 1963                 | 6782                      |
| Magnesium mg/kg                                                                                                                                  | 783                  | 2433                      |
| Iron mg/kg                                                                                                                                       | 45                   | 191                       |
| Zinc mg/kg                                                                                                                                       | 18                   | 56.4                      |
| Copper mg/kg                                                                                                                                     | 3                    | 12.0                      |
| Chromium mg/kg                                                                                                                                   | <1                   | 6.68                      |
| Arsenic mg/kg                                                                                                                                    | <0.05                | 0.11                      |
| Selenium mg/kg                                                                                                                                   | 0.14                 | 0.36                      |
| Cadmium mg/kg                                                                                                                                    | <0.05                | <0.05                     |
| Lead mg/kg                                                                                                                                       | 0.22                 | 0.1                       |
| Manganese mg/kg                                                                                                                                  | 11                   | 77                        |
| <i>Amino Acids</i>                                                                                                                               |                      |                           |
| Aspartic Acid mg/kg                                                                                                                              | 4400                 | 11100                     |
| Threonine mg/kg                                                                                                                                  | 2200                 | 5900                      |
| Serine mg/kg                                                                                                                                     | 2800                 | 8500                      |
| Glutamic Acid mg/kg                                                                                                                              | 11500                | 41900                     |
| Proline mg/kg                                                                                                                                    | 5100                 | 15900                     |
| Glycine mg/kg                                                                                                                                    | 2400                 | 6300                      |
| Alanine mg/kg                                                                                                                                    | 4400                 | 12500                     |
| Valine mg/kg                                                                                                                                     | 3100                 | 8500                      |
| Isoleucine mg/kg                                                                                                                                 | 2200                 | 6600                      |
| Leucine mg/kg                                                                                                                                    | 6900                 | 21500                     |
| Tyrosine mg/kg                                                                                                                                   | 1700                 | 6400                      |
| Phenylalanine mg/kg                                                                                                                              | 3100                 | 9800                      |
| Histidine mg/kg                                                                                                                                  | 1700                 | 3900                      |
| Lysine mg/kg                                                                                                                                     | 1900                 | 7800                      |
| Arginine mg/kg                                                                                                                                   | 2800                 | 7400                      |
| Tryptophan mg/kg                                                                                                                                 | <500                 | 1710                      |
| Cysteine mg/kg                                                                                                                                   | 1150                 | 3700                      |
| Methionine mg/kg                                                                                                                                 | 1020                 | 4600                      |
| *Analyses of both diets were conducted by NP Analytic Laboratories, St. Louis Missouri                                                           |                      |                           |

| <b>Supplemental Table 2:</b> Forward and reverse sequences of primers used to measure the concentration of mRNA in liver tissue |                         |               |                      |              |
|---------------------------------------------------------------------------------------------------------------------------------|-------------------------|---------------|----------------------|--------------|
| <i>Gene</i>                                                                                                                     | <i>Sequence (5'→3')</i> | <i>Length</i> | <i>T<sub>m</sub></i> | <i>Slope</i> |
| <b>Phosphatidylethanolamine N-Methyltransferase</b>                                                                             |                         |               |                      | -3.188       |
| Forward primer                                                                                                                  | ACTCATGCATGCTAGTCCCA    | 20            | 58.79                |              |
| Reverse primer                                                                                                                  | AGCAGTGAAGGGCTCTTCAT    | 20            | 59.01                |              |
| <b>Apolipoprotein B</b>                                                                                                         |                         |               |                      | -3.798       |
| Forward primer                                                                                                                  | TGGCAAACATGCATAGCATCC   | 21            | 59.52                |              |
| Reverse primer                                                                                                                  | TCAAATTGGGACTCTCCTTAGC  | 23            | 58.41                |              |
| <b>Peroxisome Proliferator Activated Receptor Alpha</b>                                                                         |                         |               |                      | -3.49        |
| Forward primer                                                                                                                  | AGAGCCCATCTGTCCCTCTC    | 20            | 60.4                 |              |
| Reverse primer                                                                                                                  | ACTGGTAGTCTGCAAAACCAAA  | 22            | 58.37                |              |
| <b>Carnitine Palmitoyltransferase 1 Alpha</b>                                                                                   |                         |               |                      | -3.423       |
| Forward primer                                                                                                                  | CTCCGCCTGAGCCATGAAG     | 19            | 60.52                |              |
| Reverse primer                                                                                                                  | CACCAGTGATGATGCCATTCT   | 21            | 58.35                |              |
| <b>Beta Glucuronidase</b>                                                                                                       |                         |               |                      | -3.322       |
| Forward primer                                                                                                                  | CCGACCTCTCGAACAACCG     | 19            | 60.44                |              |
| Reverse primer                                                                                                                  | GCTTCCCGTTCATACCACACC   | 21            |                      |              |

**Supplemental Table 3:** Baseline characteristics, growth data, and hepatic concentrations of measured metabolites for different groups of weanling mice fed different diets; Maize Vegetable Diet fed for 6 days, (MVD-6), Maize Vegetable Diet fed for 13 days (MVD-13), Maize Vegetable Diet with supplemental choline, for 9 days (MVD+C), and control Chow for 13 days. Values are means  $\pm$  SE; n = number of liver tissue specimens available for analysis.

|                                                 | MVD6                   | P Value        |                |               | MVD13                  | P Value         |                | MVD+C                   | P Value        | Chow                    |
|-------------------------------------------------|------------------------|----------------|----------------|---------------|------------------------|-----------------|----------------|-------------------------|----------------|-------------------------|
|                                                 |                        | MVD6 vs. MVD13 | MVD6 vs. MVD+C | MVD6 vs. Chow |                        | MVD13 vs. MVD+C | MVD13 vs. Chow |                         | MVD+C vs. Chow |                         |
| Total number of mice /<br>Number of female mice | 4 / 1                  |                |                |               | 5 / 2                  |                 |                | 4 / 2                   |                | 10 / 6                  |
| Start Weight                                    | 10.47 $\pm$ 0.08       | 0.91           | 0.014          | 0.06          | 10.86 $\pm$ 0.2        | 0.04            | 0.17           | 12.59 $\pm$ 0.18        | 0.55           | 11.9 $\pm$ 0.39         |
| Body Wt. (g) on PND 21                          |                        |                |                |               |                        |                 |                |                         |                |                         |
| Mean Daily Wt. Gain g/day                       | 0.35 $\pm$ 0.08        | 0.36           | <0.01          | <0.01         | 0.25 $\pm$ 0.07        | 0.03            | <0.01          | 0.08 $\pm$ 0.03         | <0.01          | 0.59 $\pm$ 0.03         |
| Mean Daily Lean Wt. Gain<br>g/day               | 0.32 $\pm$ 0.03        | 0.08           | <0.01          | 0.21          | 0.2 $\pm$ 0.02         | 0.22            | <0.01          | 0.11 $\pm$ 0.01         | <0.01          | 0.4 $\pm$ 0.03          |
| Mean Daily Fat Wt. Gain<br>g/day                | 0.04 $\pm$ 0.02        | 0.97           | <0.01          | <0.01         | 0.03 $\pm$ 0.01        | <0.01           | <0.01          | -0.06 $\pm$ 0.01        | <0.01          | 0.16 $\pm$ 0.01         |
| Wt. Adjusted Food intake<br>g / Bw.day          | 0.25 $\pm$ 0.01        | 0.87           | 0.01           | 0.26          | 0.26 $\pm$ 0.01        | <0.01           | 0.04           | 0.19 $\pm$ 0.01         | 0.16           | 0.22 $\pm$ 0.01         |
| Wt. Adjusted Energy Intake<br>Kcal / g BW.day   | 0.91 $\pm$ 0.03        | 0.89           | 0.01           | 0.15          | 0.94 $\pm$ 0.03        | <0.01           | 0.02           | 0.72 $\pm$ 0.03         | 0.16           | 0.81 $\pm$ 0.03         |
| Feed Efficiency<br>$\Delta$ Wt. g / g Feed      | 0.12 $\pm$ 0.01        | 0.02           | <0.01          | <0.01         | 0.08 $\pm$ 0.01        | 0.02            | <0.01          | 0.03 $\pm$ 0.01         | <0.01          | 0.17 $\pm$ 0.01         |
| Hepatic Methionine<br>nmol/g                    | 305 $\pm$ 50<br>n=3    | 0.49           | 0.11           | 0.729         | 389 $\pm$ 43<br>n=4    | 0.01            | 0.982          | 147 $\pm$ 12<br>n=3     | 0.02           | 368 $\pm$ 43<br>n=3     |
| Hepatic Choline<br>nmol/g                       | 693 $\pm$ 238<br>n=4   | 0.74           | 0.97           | 0.01          | 895 $\pm$ 79<br>n=4    | 0.48            | 0.04           | 598 $\pm$ 51<br>n=3     | 0.01           | 1532 $\pm$ 171<br>n=3   |
| Hepatic<br>Dimethylglycine nmol/g               | 4.89 $\pm$ 1.28<br>n=4 | 0.81           | 0.01           | <0.01         | 8.61 $\pm$ 1.85<br>n=4 | 0.02            | 0.02           | 24.0 $\pm$ 2.0<br>n=3   | 0.44           | 31.00 $\pm$ 5.73<br>n=3 |
| Hepatic Betaine<br>nmol/g                       | 501 $\pm$ 78<br>n=4    | 0.01           | <0.01          | 0.64          | 1566 $\pm$ 198<br>n=4  | 0.02            | 0.05           | 2502 $\pm$ 252<br>n=3   | <0.01          | 812 $\pm$ 31<br>n=3     |
| Hepatic TMAO<br>nmol/g                          | 1.25 $\pm$ 0.86<br>n=4 | 0.96           | 0.01           | 0.97          | 0.15 $\pm$ 0.03<br>n=4 | <0.01           | 1.0            | 11.17 $\pm$ 3.4<br>n=3  | <0.01          | 0.29 $\pm$ 0.09<br>n=3  |
| Relative PEMT Expression                        | 3.34 $\pm$ 1.3<br>n=3  | 0.5            | 0.73           | 0.26          | 0.28 $\pm$ 0.08<br>n=3 | 0.14            | 0.96           | 5.53 $\pm$ 2.63<br>n=3  | 0.26           | 1.28 $\pm$ 0.44<br>n=3  |
| Relative CPT1a Expression                       | 3.55 $\pm$ 1.95<br>n=3 | 0.93           | 1.0            | 0.99          | 1.03 $\pm$ 0.37<br>n=3 | 0.06            | 0.79           | 14.11 $\pm$ 5.52<br>n=3 | 0.2            | 4.91 $\pm$ 0.4<br>n=3   |
| Relative Apo B100<br>Expression                 | 2.68 $\pm$ 1.05<br>n=3 | 0.98           | 1.0            | 0.26          | 0.58 $\pm$ 0.21<br>n=3 | 0.41            | 0.39           | 2.41 $\pm$ 1.09<br>n=3  | 0.48           | 1.61 $\pm$ 0.41<br>n=3  |
| Relative PPAR $\alpha$ Expression               | 0.43 $\pm$ 0.08<br>n=3 | 0.98           | 0.86           | 0.18          | 0.83 $\pm$ 0.35<br>n=2 | 0.99            | 0.99           | 1.18 $\pm$ 0.29<br>n=3  | 0.48           | 2.63 $\pm$ 1.21<br>n=3  |
| Hepatic Fat % Objects<br>staining red in liver  | 0.72 $\pm$ 0.01<br>n=3 | 0.99           | 0.01           | 0.01          | 0.71 $\pm$ 0.01<br>n=2 | 0.03            | 0.03           | 0.18 $\pm$ 0.12<br>n=4  | 1.0            | 0.183 $\pm$ 0.1<br>n=4  |

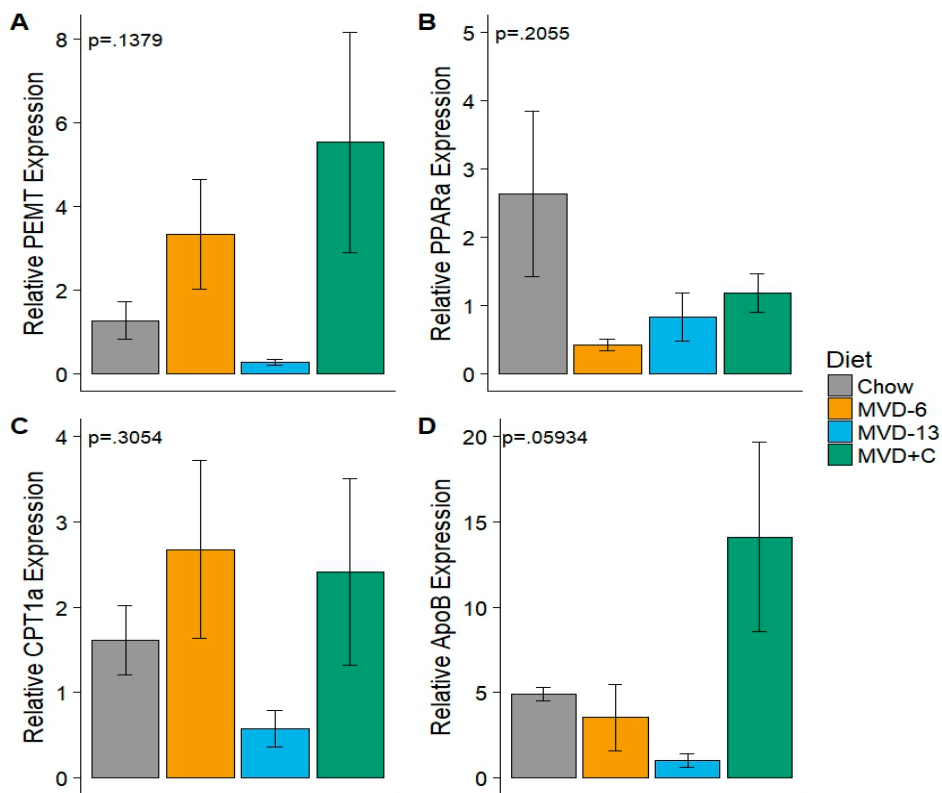

**Figure S1.** Hepatic concentrations of mRNA transcripts in weanling mice fed the control chow diet ( $n = 3$ ), the maize vegetable diet (MVD) for 6 days (MVD-6;  $n = 4$ ) or 13 days (MVD-13;  $n = 4$ ), or the MVD with supplemental choline for 9 days (MVD + C;  $n = 3$ ). (A) phosphatidylethanolamine methyltransferase (PEMT); (B) peroxisomal proliferator activated receptor- $\alpha$  (PPAR- $\alpha$ ); (C) carnitine palmitoyl transferase 1a (CPT1a); and (D) apolipoprotein-B100 (ApoB). Values are expressed as  $2^{\Delta Ct}$  relative to  $\beta$ -glucuronidase. Bars represent mean values  $\pm$  SE.
